# Supplementary material
Source: PubMed Central journal article supplement (PMC10849195)
Supplement: NIHMS1881395-supplement-1.pdf [file NIHMS1881395-supplement-1.pdf]

**Supplementary Table 1.** Description of laboratory tests, results, and their clinical significance [38,41].

| <b>Laboratory test</b>           | <b>Trend</b>           | <b>Clinical significance</b>             | <b>Commonly Ordered Inpatient Labs</b> |
|----------------------------------|------------------------|------------------------------------------|----------------------------------------|
| Prothrombin Time (PT)            | Increased              | Bleeding disorders                       | Yes                                    |
| Aspartate Aminotransferase (AST) | Increased              | Impaired hepatic function                | Yes                                    |
| Alanine Aminotransferase (ALT)   | Increased              | Impaired hepatic function                | Yes                                    |
| Creatinine                       | Increased              | Impaired renal function                  | Yes                                    |
| Albumin                          | Decreased              | Impaired hepatic or renal function       | Yes                                    |
| Leukocytes                       | Increased              | Infection                                | Yes                                    |
| Lymphocyte                       | Increased              | Infection                                | Yes                                    |
| Neutrophil                       | Increased              | Infection                                | Yes                                    |
| Fibrinogen                       | Decreased<br>Increased | Bleeding disorders<br>Clotting disorders | No                                     |
| D-dimer                          | Increased              | Clotting disorder                        | No                                     |
| Troponin                         | Increased              | Cardiac injury                           | No                                     |
| Bilirubin                        | Increased              | Impaired hepatic function                | Yes                                    |
| Lactate Dehydrogenase (LDH)      | Increased              | Liver, lung, and other tissue damage     | No                                     |
| Procalcitonin                    | Increased              | Infection, sepsis                        | No                                     |
| Ferritin                         | Increased              | Inflammation, infection                  | No                                     |
| C-Reactive Protein (CRP)         | Increased              | Inflammation                             | No                                     |
